# Supplementary material
Source: ML conference proceedings conference paper supplement (https://openaccess.thecvf.com/content/WACV2025/html/Gaydon_PureForest_A_Large-Scale_WACV_2025_paper.html)
Supplement: Supplementary file 1 [file Gaydon_PureForest_A_Large-Scale_WACV_2025_supplemental.pdf]

## Supplementary Material for WACV 2025 Submission N°1854: ”PureForest: A Large-Scale Aerial Lidar and Aerial Imagery Dataset for Tree Species Classification in Monospecific Forests”

### A. Data Access and Code Repositories

The PureForest dataset is hosted on HuggingFace under the Open Licence 2.0 of Etalab: [IGNF/PureForest](#).

Benchmark code for 3D models comes from the Myria3D library [7] which was adapted for the task of scene classification. It is available at [github.com/IGNF/myria3d/tree/PureForest/Encoder-Nocolor](#).

Benchmark code for the image classifier is available at [github.com/IGNF/PureForest-Baseline](#).

### B. Structure of files and directories in PureForest

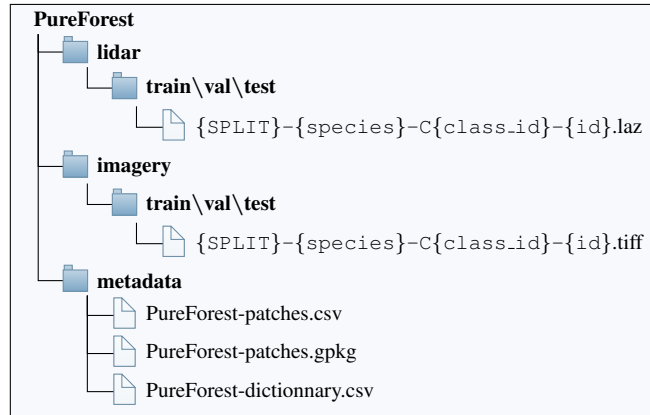

Naming convention for data patches is shown in the above figure, where `SPLIT` is either TRAIN, VAL, or TEST, `class_id` indicates the semantic class identifier (zero-based), and `patch_id` is a unique patch identifier. For instance, `TEST-Quercus_pubescens-C0-199_7_327.laz` refers to a Lidar point cloud of a deciduous oak forest from the test set. In folder `metadata`, one can find three files:

- `PureForest-patches.gpkg`: listing of all patches with class labels and some metadata, including their membership to an annotation polygon.
- `PureForest-patches.csv`: same content, except without patch geometries, provided for convenience.
- `PureForest-dictionary.csv`: gives a reference mapping for all species present in the dataset to their french/english/latin names, their category in the *BD Forêt V2*, and their species code as defined by the NFI.

## C. PureForest statistics

### C.1. Support of semantic classes in train, val and test sets.

| Class         | ID | Train   |          | Val     |          | Test    |          |
|---------------|----|---------|----------|---------|----------|---------|----------|
|               |    | Patches | Polygons | Patches | Polygons | Patches | Polygons |
| Deciduous oak | 0  | 15840   | 63       | 4374    | 14       | 27841   | 14       |
| Evergreen oak | 1  | 11609   | 26       | 372     | 4        | 10380   | 6        |
| Beech         | 2  | 7008    | 21       | 1626    | 4        | 4036    | 4        |
| Chestnut      | 3  | 3337    | 16       | 147     | 2        | 200     | 3        |
| Black locust  | 4  | 1663    | 83       | 323     | 12       | 317     | 12       |
| Maritime pine | 5  | 4568    | 20       | 960     | 3        | 2040    | 4        |
| Scotch pine   | 6  | 11330   | 34       | 2429    | 7        | 4506    | 5        |
| Black pine    | 7  | 4356    | 16       | 942     | 3        | 1928    | 3        |
| Aleppo pine   | 8  | 4028    | 15       | 233     | 2        | 438     | 2        |
| Fir           | 9  | 96      | 2        | 722     | 1        | 22      | 1        |
| Spruce        | 10 | 2579    | 16       | 627     | 3        | 868     | 4        |
| Larch         | 11 | 2536    | 7        | 503     | 1        | 255     | 1        |
| Douglas       | 12 | 161     | 11       | 265     | 2        | 104     | 2        |

### C.2. Support of tree species in train, val and test sets.

| Class         | ID | Tree species          | Train   |          | Val     |          | Test    |          |
|---------------|----|-----------------------|---------|----------|---------|----------|---------|----------|
|               |    |                       | Patches | Polygons | Patches | Polygons | Patches | Polygons |
| Deciduous oak | 0  | Quercus robur         | 144     | 4        | 1       | 1        | 302     | 1        |
|               |    | Quercus pubescens     | 12937   | 51       | 4084    | 11       | 27496   | 11       |
|               |    | Quercus petraea       | 2749    | 6        | 279     | 1        | 43      | 2        |
|               |    | Quercus rubra         | 10      | 2        | 10      | 1        | 0       | 0        |
| Evergreen oak | 1  | Quercus ilex          | 11609   | 26       | 372     | 4        | 10380   | 6        |
| Beech         | 2  | Fagus sylvatica       | 7008    | 21       | 1626    | 4        | 4036    | 4        |
| Chestnut      | 3  | Castanea sativa       | 3337    | 16       | 147     | 2        | 200     | 3        |
| Black locust  | 4  | Robinia pseudoacacia  | 1663    | 83       | 323     | 12       | 317     | 12       |
| Maritime pine | 5  | Pinus pinaster        | 4568    | 20       | 960     | 3        | 2040    | 4        |
| Scotch pine   | 6  | Pinus sylvestris      | 11330   | 34       | 2429    | 7        | 4506    | 5        |
| Black pine    | 7  | Pinus nigra laricio   | 1824    | 7        | 916     | 2        | 1288    | 2        |
|               |    | Pinus nigra           | 2532    | 9        | 26      | 1        | 640     | 1        |
| Aleppo pine   | 8  | Pinus halepensis      | 4028    | 15       | 233     | 2        | 438     | 2        |
| Fir           | 9  | Abies nordmanniana    | 29      | 1        | 0       | 0        | 0       | 0        |
|               |    | Abies alba            | 67      | 1        | 722     | 1        | 22      | 1        |
| Spruce        | 10 | Picea abies           | 2579    | 16       | 627     | 3        | 868     | 4        |
| Larch         | 11 | Larix decidua         | 2536    | 7        | 503     | 1        | 255     | 1        |
| Douglas       | 12 | Pseudotsuga menziesii | 161     | 11       | 265     | 2        | 104     | 2        |

D. Experimental results for the image model

D.1. Classwise test metrics of the image model.

| Class         | Prec.       | Rec.        | F1          | Acc.        | Patches |
|---------------|-------------|-------------|-------------|-------------|---------|
| Deciduous oak | 94.8        | 63.5        | 76.1        | 63.5        | 48055   |
| Evergreen oak | 56.7        | 80.6        | 66.6        | 80.6        | 22361   |
| Beech         | 88.9        | 85.9        | 87.4        | 85.9        | 12670   |
| Chestnut      | 6.3         | 38.5        | 10.9        | 38.5        | 3684    |
| Black locust  | 25.9        | 86.4        | 39.9        | 86.4        | 2303    |
| Maritime pine | <b>95.2</b> | 93.4        | 94.3        | 93.4        | 7568    |
| Scotch pine   | 54.2        | 97.0        | 69.5        | 97.0        | 18265   |
| Black pine    | 89.9        | 65.9        | 76.1        | 65.9        | 7226    |
| Aleppo pine   | 64.1        | 96.6        | 77.0        | 96.6        | 4699    |
| Fir           | 0.0         | 0.0         | 0.0         | 0.0         | 840     |
| Spruce        | 84.7        | 60.0        | 70.3        | 60.0        | 4074    |
| Larch         | 87.4        | <b>98.0</b> | <b>92.4</b> | <b>98.0</b> | 3294    |
| Douglas       | 22.9        | 65.4        | 33.9        | 65.4        | 530     |

D.2. Confusion matrix of the image model on the test set normalized by rows.

|               | Deciduous     |               |       |          |              | Coniferous    |             |            |             |        |        |       |         |
|---------------|---------------|---------------|-------|----------|--------------|---------------|-------------|------------|-------------|--------|--------|-------|---------|
|               | Oaks          |               |       | Others   |              | Pines         |             |            |             | Others |        |       |         |
|               | Deciduous oak | Evergreen oak | Beech | Chestnut | Black locust | Maritime pine | Scotch pine | Black pine | Aleppo pine | Fir    | Spruce | Larch | Douglas |
| Deciduous oak | 63.49         | 22.82         | 0.61  | 2.7      | 2.75         | 0.14          | 7           | 0.09       | 0.28        | 0      | 0      | 0.07  | 0       |
| Evergreen oak | 6.61          | 80.63         | 1.35  | 0.01     | 0            | 0.26          | 9.9         | 0.02       | 1.17        | 0      | 0      | 0     | 0       |
| Beech         | 3.56          | 0.44          | 85.92 | 7.97     | 0            | 0             | 2.05        | 0          | 0           | 0      | 0      | 0     | 0.02    |
| Chestnut      | 17            | 0             | 31.5  | 38.5     | 0            | 0             | 13          | 0          | 0           | 0      | 0      | 0     | 0       |
| Black locust  | 8.83          | 0             | 1.26  | 2.83     | 86.43        | 0             | 0           | 0          | 0           | 0      | 0      | 0.31  | 0.31    |
| Maritime pine | 0.78          | 0.14          | 0.09  | 1.32     | 0.78         | 93.38         | 0.39        | 1.07       | 0.73        | 0      | 0      | 0     | 1.27    |
| Scotch pine   | 1.1           | 0.31          | 0.04  | 0.06     | 0            | 0             | 97.02       | 0.9        | 0.46        | 0.02   | 0.04   | 0     | 0       |
| Black pine    | 0.2           | 0             | 2.69  | 1.34     | 0            | 0.93          | 25.41       | 65.92      | 0           | 0      | 3.11   | 0.15  | 0.2     |
| Aleppo pine   | 0             | 0             | 0     | 0        | 0            | 0             | 3.42        | 0          | 96.57       | 0      | 0      | 0     | 0       |
| Fir           | 0             | 0             | 0     | 0        | 0            | 0             | 77.27       | 0          | 0           | 0      | 0      | 0     | 22.72   |
| Spruce        | 0.23          | 0.57          | 0     | 0        | 0            | 1.49          | 8.75        | 5.41       | 0           | 0.34   | 60.02  | 1.15  | 22      |
| Larch         | 0             | 0             | 0     | 0        | 0            | 0             | 0.39        | 1.56       | 0           | 0      | 0      | 98.03 | 0       |
| Douglas       | 0.96          | 0             | 0     | 0        | 0            | 0             | 3.84        | 0          | 0           | 0      | 28.84  | 0.96  | 65.38   |

### E. Semantic relationship between tree species, classification labels, and foliage type.

| french name            | latin name            | english name     | label         | foliage   |            |
|------------------------|-----------------------|------------------|---------------|-----------|------------|
| Chêne rouvre           | Quercus petraea       | Sessile oak      | Deciduous oak | deciduous |            |
| Chêne pubescent        | Quercus pubescens     | Downy oak        |               |           |            |
| Chêne pédonculé        | Quercus robur         | English oak      |               |           |            |
| Chêne rouge d'Amérique | Quercus rubra         | Northern red oak |               |           |            |
| Chêne vert             | Quercus ilex          | Holm oak         | Evergreen oak |           |            |
| Hêtre commun           | Fagus sylvatica       | European beech   | Beech         |           |            |
| Châtaignier commun     | Castanea sativa       | Sweet chestnut   | Chestnut      |           |            |
| Robinier faux-acacia   | Robinia pseudoacacia  | Black locust     | Black locust  |           |            |
| Pin maritime           | Pinus pinaster        | Maritime pine    | Maritime pine |           | coniferous |
| Pin sylvestre          | Pinus sylvestris      | Scots pine       | Scotch pine   |           |            |
| Pin laricio de Corse   | Pinus nigra laricio   | Corsican pine    | Black pine    |           |            |
| Pin noir               | Pinus nigra           | Austrian pine    |               |           |            |
| Pin d'Alep             | Pinus halepensis      | Aleppo pine      | Aleppo pine   |           |            |
| Sapin pectiné          | Abies alba            | Silver fir       | Fir           |           |            |
| Sapin de Nordmann      | Abies nordmanniana    | Nordmann fir     |               |           |            |
| Épicéa commun          | Picea abies           | European spruce  | Spruce        |           |            |
| Mélèze d'Europe        | Larix decidua         | European larch   | Larch         |           |            |
| Douglas vert           | Pseudotsuga menziesii | Douglas fir      | Douglas       |           |            |

## F. Image and point cloud samples for each of the 18 tree species in PureForest.

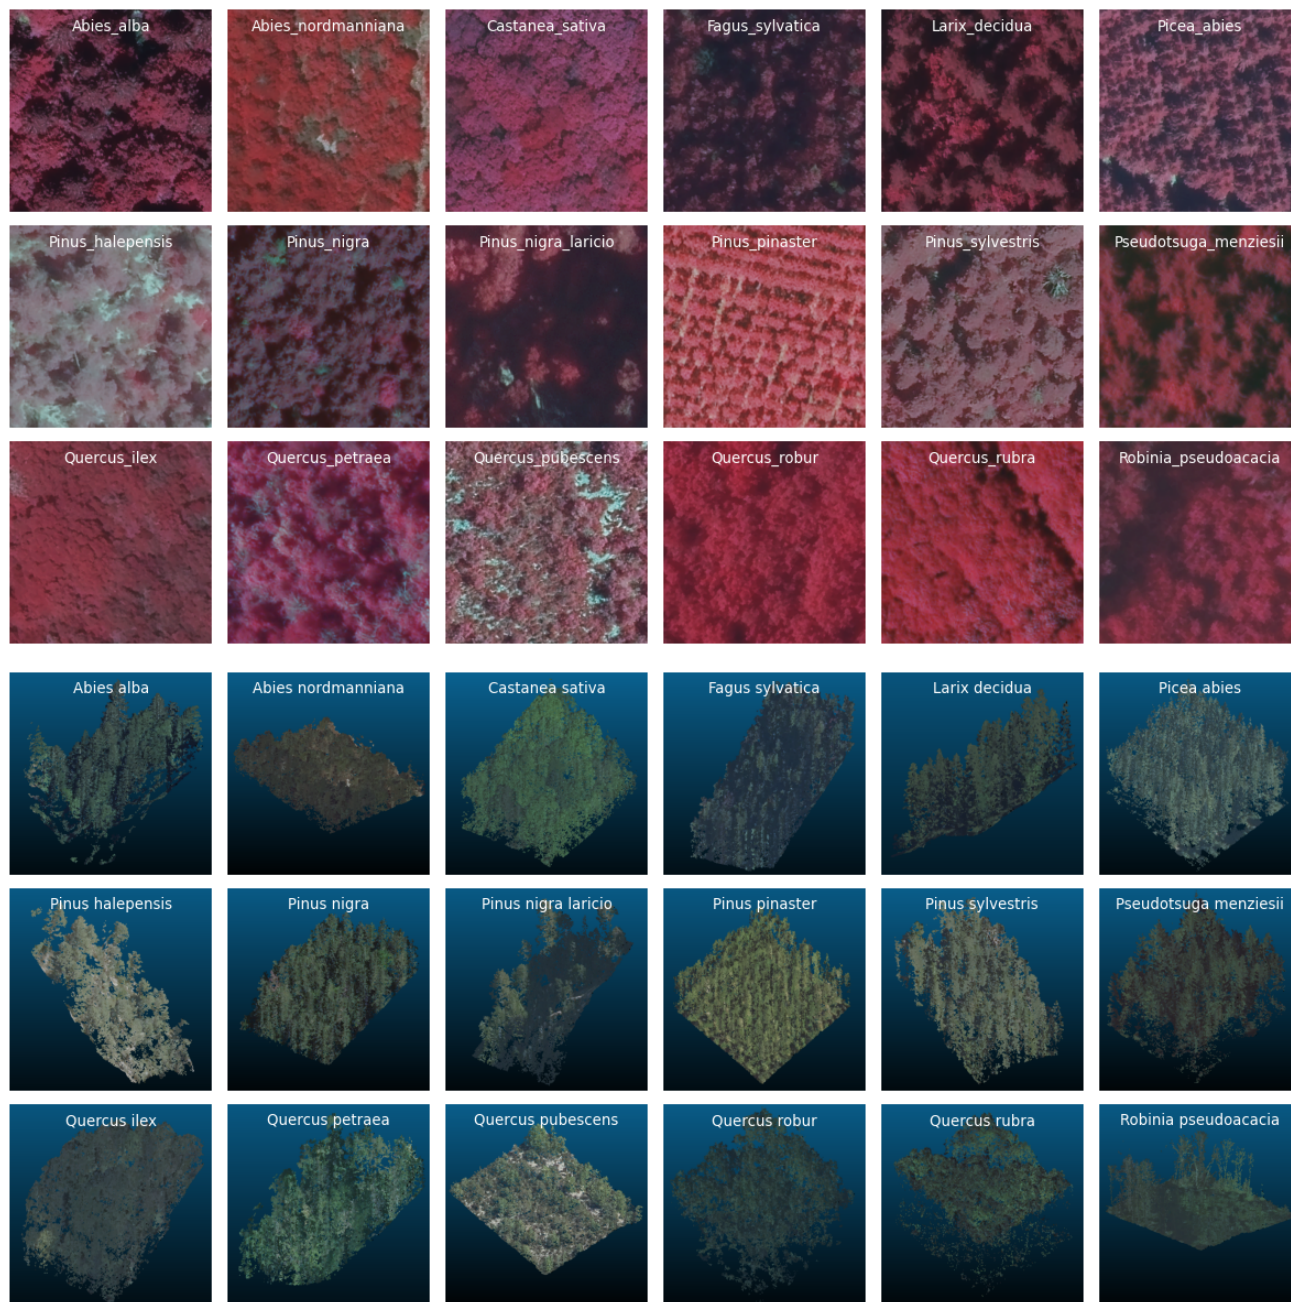

Aerial images are displayed in fake colors (near-infrared, red, green)

## G. Introduction to 3D deep learning architectures

To provide some background, we give a brief overview of 3D deep learning approaches, and then talk briefly about their application to tree species classification.

Processing unstructured, unordered sets of points is challenging, and researchers would initially try to turn point clouds into structured data i.e. put them “on a grid”. In voxel-based models such as SegCloud [31], 3D convolutions process a voxelized version of a point cloud. In multi-view approaches like SnapNet [3], 2D views or projections of point clouds would be processed by traditional 2D convolutional neural networks. In these methods, the semantic segmentation happens on a regular grid and is then projected back to the point cloud.

Deep learning that operates directly from point clouds is recent [2]. In 2016, [28] introduce PointNet, a pioneering architecture that deals directly with disordered point sets using multiple shared MLPs and symmetric pooling operations. One year later, [29] propose PointNet++, which builds on PointNet layers to process points clouds on nested partitions of the input point cloud. PointNet++ is the best known representative of point-based methods which are characterized by PointNet-like operations hierarchically organized in a U-shaped architecture. From a performance point of view, an interesting successor of PointNet++ is RandLA-Net [12]. Introduced in 2019, RandLa-Net features some performance improvements thanks to the use of random subsampling combined with an explicit consideration of the relative positions of points in space. This makes it a suitable architecture for the large scales characteristic of remote sensing applications.

Point clouds can be represented as graphs: nodes correspond to points and edges capture spatial relationships, which can then be processed by a Graph Convolutional Networks (GNN). In 2018, DGCNN (Dynamic Graph CNN) was introduced by [32], in which edge convolutional layers capture geometric structures. Alternatively, Graph Attention Networks (GAN) have been proposed: in 2021, [9] introduce the Point Cloud Transformer, which fully relies on attention layers to capture geometric structures.

Along 3D neural architectures, new representations of point clouds have been proposed. In 2017, [21] introduce their SuperPoint Graph, a partitioning of a point cloud scene into groups of semantically homogeneous points that can be processed with high efficiency by graph neural networks. Most recently, [30] turned the SuperPoint Graph into a Hierarchical SuperPoint Partition i.e. a partition of nested, increasingly coarser SuperPoints. Additionally, they propose a variant of graph-attention networks to operate directly on the SuperPoint Partition, resulting in highly efficient cloud processing.

For tree species classification from Lidar point clouds, PointNet++ is considered by many as the default solution [5,23–25]. While not the most recent architecture, it is still highly robust and competitive. Interestingly, [23] show that performance is task dependent. Compared to 5 other state-of-the-art architectures, PointNet++ underperforms in a generic 3D object classification benchmark but is among the top three performers in classifying 7 tree species from Unmanned Laser Scanning (ULS) data. In addition, we note that some researchers choose to transpose point cloud data into the 2D domain, allowing them to use image-based methods. For example, [34] build a canopy height model (CHM) from ULS data, which they then feed into a pre-trained image neural network.
